# Supplementary material
Source: Springer Nature journal article supplement (https://www.springermedizin.de/resource/supplementary/12876_2011_690_MOESM4_ESM.pdf/9437452)
Supplement: MOESM4 [file 9437452]

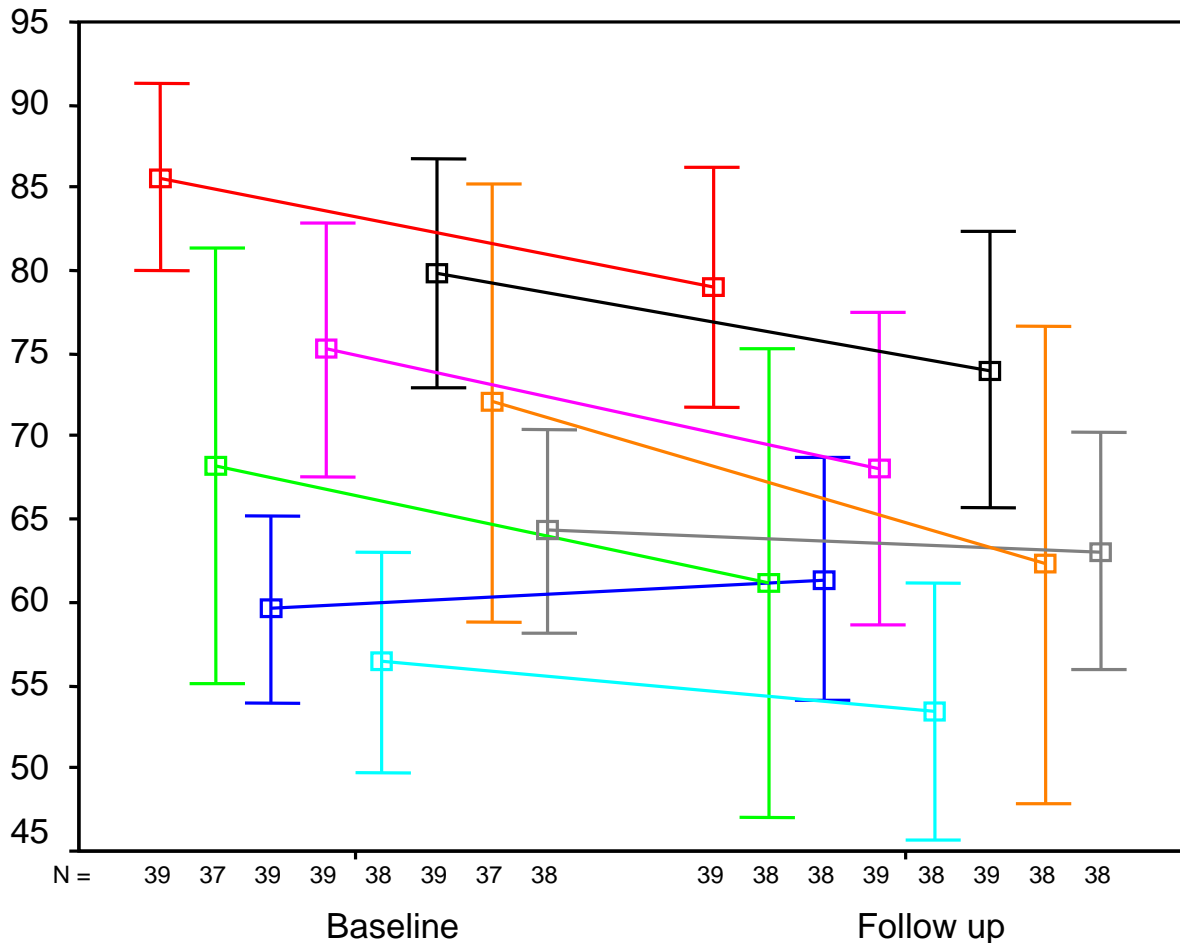

- physical functioning
- role physical functioning
- general health
- bodily pain
- vitality
- social functioning
- role emotional functioning
- mental health

N =

Baseline

Follow up

Time
